# Supplementary material for: Reaction pathways for hydrogen desorption from magnesium hydride/hydroxide composites: bulk and interface effects
Source: Royal Society of Chemistry journal article supplement (doi:10.1039/b912964b), 2009-11-16
Supplement: b912964b.pdf [file b912964b.pdf]

**Fig. S1.** Kissinger plots corresponding to H<sub>2</sub>O (a), LT-H<sub>2</sub> (b), IT-H<sub>2</sub> (c) and HT-H<sub>2</sub> (d) desorption events. Full circles correspond to composites with  $\chi_{\text{Mg(OH)}_2}=0.055$ , whereas open circles are from as received MgH<sub>2</sub> ( $\chi_{\text{Mg(OH)}_2}=0.0045$ ). It should be noted that the activation energies of the HT-H<sub>2</sub> desorption peak are similar for both samples (within  $\pm 2\%$ ).

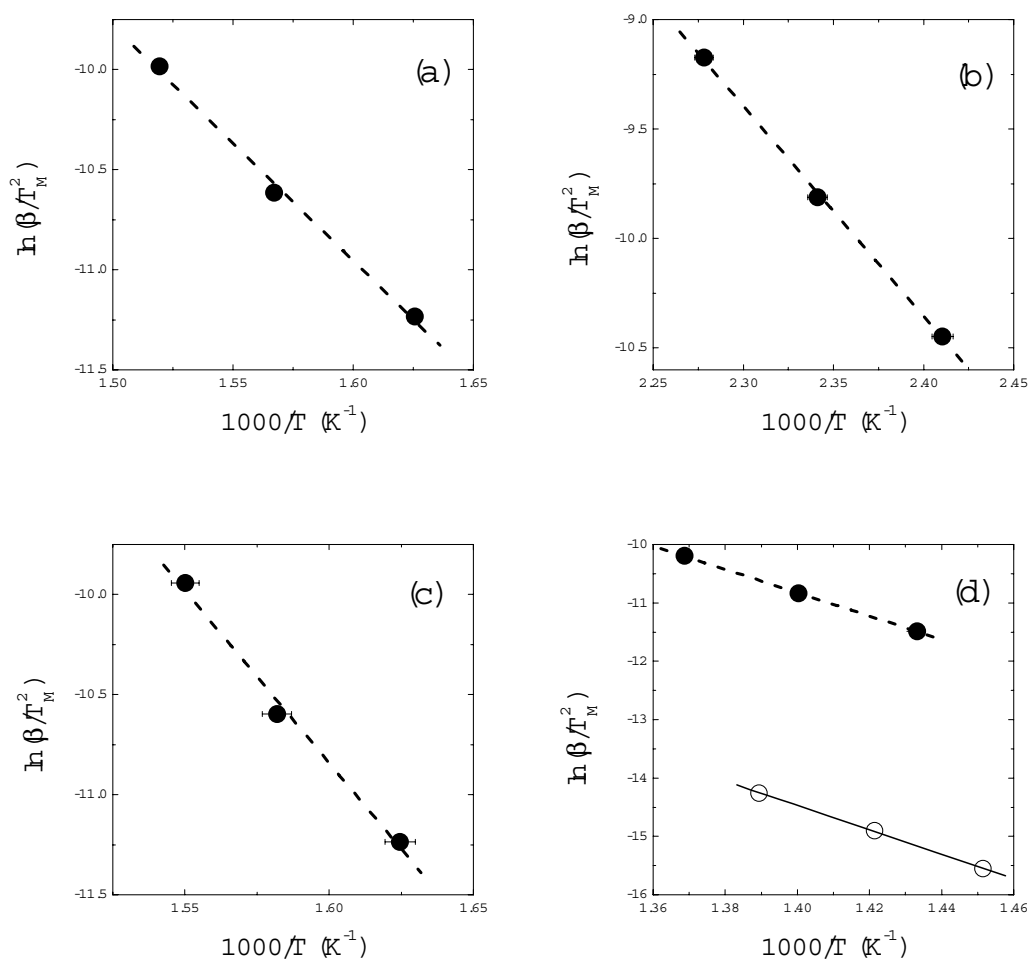

**Table S1.** Microstructural parameters (phase abundances, A; crystallite sizes, D; unit cell volumes, V) obtained from the Rietveld refinement of the XRD patterns shown in Fig.1. Data correspond to samples exposed to air for: (a) non-exposed material (as received MgH<sub>2</sub>), (b) two hours, (c) two months, (d) four months.

| Sample   | Phases           |        |                    |                     |        |                    |         |        |                    |         |        |                    |
|----------|------------------|--------|--------------------|---------------------|--------|--------------------|---------|--------|--------------------|---------|--------|--------------------|
|          | MgH <sub>2</sub> |        |                    | Mg(OH) <sub>2</sub> |        |                    | Mg      |        |                    | MgO     |        |                    |
|          | A (wt%)          | D (nm) | V(Å <sup>3</sup> ) | A (wt%)             | D (nm) | V(Å <sup>3</sup> ) | A (wt%) | D (nm) | V(Å <sup>3</sup> ) | A (wt%) | D (nm) | V(Å <sup>3</sup> ) |
| <b>a</b> | 88±6             | } >400 | 61.88              | 2±2                 | 4      | 40.65              | 7±3     | 86     | 46.75              | 3±2     | 8      | 75.75              |
| <b>b</b> | 84               |        | 61.88              | 4                   | 27     | 40.64              | 5       | 270    | 46.76              | 7       | 28     | 75.75              |
| <b>c</b> | 29               |        | 61.69              | 61                  | 16     | 41.08              | 3       | 145    | 46.57              | 7       | 14     | 74.68              |
| <b>d</b> | 10               |        | 61.60              | 83                  | 27     | 41.10              | 4       | 50     | 46.49              | 3       | 21     | 74.68              |
